1 Contrast thresholds reveal different visual masking functions in humans and praying mantises

2 Ghaith Tarawneh<sup>1\*</sup>, Vivek Nityananda<sup>1</sup>, Ronny Rosner<sup>1</sup>, Steven Errington<sup>1</sup>, William  
3 Herbert<sup>1</sup>, Sandra Arranz-Paraíso<sup>2</sup>, Natalie Busby<sup>1,#a</sup>, Jimmy Tampin<sup>1</sup>, Jenny Read<sup>1</sup>, Ignacio  
4 Serrano-Pedraza<sup>2</sup>

5 <sup>1</sup>Institute of Neuroscience, Henry Wellcome Building for Neuroecology, Newcastle  
6 University, Framlington Place, Newcastle Upon Tyne, United Kingdom

7 <sup>2</sup>Faculty of Psychology, Complutense University of Madrid, Madrid, Spain

8 <sup>#a</sup>Current Address: Neuroscience and Aphasia Research Unit (NARU), School of  
9 Psychological Sciences, University of Manchester, United Kingdom

10 \* Corresponding Author:

11 Email: [ghaith.tarawneh@ncl.ac.uk](mailto:ghaith.tarawneh@ncl.ac.uk) (GT)

## 12 **Summary Statement**

13 We here show that despite having similar motion detection systems, insects and humans  
14 differ in the effect of low and high spatial frequency noise on their contrast thresholds.

15 **Abstract**

16 Recently, we showed a novel property of the Hassenstein-Reichardt detector: namely, that  
17 insect motion detection can be masked by “invisible” noise, i.e. visual noise presented at  
18 spatial frequencies to which the animals do not respond when presented as a signal. While  
19 this study compared the effect of noise on human and insect motion perception, it used  
20 different ways of quantifying masking in two species. This was because the human studies  
21 measured contrast thresholds, which were too time-consuming to acquire in the insect given  
22 the large number of stimulus parameters examined. Here, we run longer experiments in  
23 which we obtained contrast thresholds at just two signal and two noise frequencies. We  
24 examine the increase in threshold produced by noise at either the same frequency as the  
25 signal, or a different frequency. We do this in both humans and praying mantises  
26 (*Sphodromantis lineola*), enabling us to compare these species directly in the same paradigm.  
27 Our results confirm our earlier finding: whereas in humans, visual noise masks much more  
28 effectively when presented at the signal spatial frequency, in insects, noise is roughly  
29 equivalently effective whether presented at the same frequency or a lower frequency. In both  
30 species, visual noise presented at a higher spatial frequency is a less effective mask.

## 31 **Introduction**

32 Insect motion vision is thought to be mediated by arrays of retinotopic elementary motion  
33 detectors (EMDs) that cross-correlate the spatial input of a small region of the visual field  
34 with a similar, but temporally delayed, input of a neighbouring region. This cross-correlation  
35 model was first proposed by Hassenstein and Reichardt to describe the optomotor response of  
36 the beetle *Chlorophanus* (Hassenstein and Reichardt 1956) and has since demonstrated  
37 outstanding agreement with behavioural and neurophysiological observations across several  
38 forms of motion-elicited behaviour including tracking (Bahl et al. 2013), collision avoidance  
39 (Srinivasan et al. 1991) and landing (Borst and Bahde 1988). Experiments have elucidated  
40 the mechanisms underlying these responses (Borst 2014) and exposed the neural pathways  
41 that mediate detector computations (Riehle and Franceschini 1984) to a remarkable level of  
42 detail.

43 EMDs consist of two mirror-symmetrical subunits that compute motion in opposing  
44 directions (Fig ). We recently showed (Tarawneh et al. 2017) that this opponency gives  
45 EMDs a surprising property: namely, motion detection can be impaired by noise which is  
46 “invisible” to the animal, in the sense that it does not elicit a response when presented as a  
47 signal. Our “signals” were drifting luminance gratings, i.e. a set of black and white vertical  
48 stripes moving horizontally across the screen. These signals, if detected, trigger the animal’s  
49 optomotor response, i.e. a body movement in the direction of the motion, which tends to keep  
50 the animal’s head aligned to the bars (Reichardt and Wenking 1969; Nityananda et al. 2015).

51 The spatial frequency of the grating corresponds to the width of the bars: wide bars represent  
52 low spatial frequencies, narrow bars represent high. To add noise, we superimposed similar  
53 gratings, at either the same or different spatial frequency, which did not move smoothly but  
54 jumped around randomly. We found that low-frequency gratings did not elicit an optomotor  
55 response when presented on their own, moving smoothly, yet still disrupted the optomotor

56 response to higher-frequency gratings when superimposed as noise. This disruption is  
57 referred to as “masking” of the signal by noise (Moore 2012; Anderson and Burr 1985).

58 We analysed the mathematics of the EMD to show why this effect occurs. Briefly, it works as  
59 follows. Insect ommatidia have a roughly Gaussian acceptance profile, so they effectively  
60 implement a low-pass spatial filter of the incoming light pattern. Thus, the first step in the  
61 EMD is a low-pass spatial filter (top row of Fig ). Low spatial frequencies naturally elicit a  
62 response in these filters. However, the later opponency step (bottom row, “subtraction”, in  
63 Fig ) cancels out this response for low enough spatial frequencies. This is why moving  
64 gratings at these frequencies do not elicit an optomotor response. However, when low  
65 frequencies are presented as noise superimposed on a signal grating of a higher frequency,  
66 this initial response can still act as noise, impairing the optomotor response elicited by  
67 gratings at higher frequencies.

68 Humans do not show this “invisible noise” effect. In our previous paper (Tarawneh et al.  
69 2017), we compared our mantis data with previously-published human data and showed that  
70 there was a qualitative difference. In humans, noise is most effective when presented at the  
71 same frequency as the signal, and becomes less effective when presented either at higher *or* at  
72 lower frequencies than the signal (Anderson and Burr 1985). We were able to explain this too  
73 within the same mathematical framework: it arises because spatial filtering in humans is  
74 bandpass.

75 A limitation of our previous paper was that we did not compare exactly the same metrics of  
76 masking in humans and mantises. In humans, Anderson & Burr (Anderson and Burr 1985)  
77 had carried out extensive psychometric experiments measuring contrast thresholds at many  
78 different combinations of signal and noise. Their measure of masking was the ratio between  
79 the contrast threshold needed to judge the direction of a moving grating when it was

80 presented alone, and the higher threshold needed when noise was added. They used data from  
81 2 human observers, and contrast thresholds were obtained by the Method of Adjustment (i.e.,  
82 observers adjusted the contrast of the moving grating by hand until its direction of drift was  
83 “just discernible”). In mantises, the Method of Adjustment is obviously not feasible.  
84 Previously (Nityananda et al. 2015), we have obtained mantis contrast thresholds from  
85 psychometric functions using the Method of Constant Stimuli (Lu and Doshier 2014). A  
86 human observer viewed mantises via a webcam and categorised each trial according to  
87 whether an optomotor response did or did not occur. The response rate increases with the  
88 contrast of the moving grating. The contrast threshold is then defined as the contrast at which  
89 a response occurs on half of the trials. The drawback of this method is that many trials are  
90 required. It was not feasible to run so many trials on each of many different combinations of  
91 signal and noise frequencies. Accordingly, in (Tarawneh et al. 2017) we used a different  
92 measure of masking in our 11 mantis observers. We kept the stimulus contrast fixed, and  
93 examined how the response rate varied for noise at different frequencies. We argued that  
94 these different metrics were equivalent, so should not affect our conclusions.

95 In this paper, we confirm this by running longer experiments for a subset of signal and noise  
96 combinations. Here, we use identical paradigms in both mantis and human observers as far as  
97 possible. As described above, stimuli are presented at a range of signal contrasts for a given  
98 noise condition, so as to obtain a complete psychometric function, which is then fitted to  
99 obtain the contrast threshold. In this independent data-set, we find the same qualitative  
100 difference in the effect of noise on human vs insect vision as with our earlier method. This  
101 confirms that the difference was not somehow an artefact of the masking metrics used in the  
102 earlier paper, and strengthens confidence in the result.

103



## 105 **Materials and Methods**

## 106 **Human Experiment H1**

107 **Subjects.** Data in Experiment H1 were collected from four subjects, all with experience in  
108 psychophysical experiments. Two were authors and two were naïve to the purposes of the  
109 study.

110 **Visual Stimulus.** The stimulus had “signal” and “noise” vertical sinusoidal gratings that  
111 moved either left or right in each trial. Signal gratings were of either 0.4 and 2 cpd  
112 frequencies and drifting at 8 Hz. Noise gratings were ideal band-pass filtered spatial noise  
113 with a bandwidth of 1 octave and a power spectral density of  $0.02 \text{ (cpd)}^{-1}$ . The phase  
114 spectrum of the noise was updated randomly on every CRT frame (refresh rate was 60 Hz),  
115 making it temporally broadband up to the Nyquist temporal frequency of 30 Hz. The contrast  
116 levels of the signal and noise components were summed at each pixel (parameters were  
117 chosen to ensure that no clipping occurred). Each presentation lasted for 1 second. Still  
118 frames, space-time plots and spatiotemporal Fourier amplitude spectra of the masked  
119 condition stimuli used in Experiment H1 are shown in Fig 1.

120 **Experimental Setup.** Participants viewed stimuli on a 19” Eizo T765 CRT monitor from a  
121 distance of 100cm and indicated perceived direction of motion by keyboard presses. The  
122 monitor had a resolution of 1280×1024 pixels, 14-bit luminance levels and subtended a visual  
123 angle of 19.18×15.37 degrees at the viewing distance of participants. Its mean luminance was  
124  $57 \text{ cd/m}^2$ . Luminance was gamma corrected ( $\gamma=2.31$ ) using a Minolta LS-100 (Konica  
125 Minolta, Japan). A chin-rest (UHCOTech HeadSpot) was used to stabilize the subject’s head.  
126 Experiments were administered by a Matlab script using Psychophysics Toolbox Version 3.  
127 DataPixx Lite and ResponsePixx Handheld devices (VPixx Technologies Inc., Canada) were  
128 used to render stimuli and capture participant responses.



129 **Experimental Procedure.** Subjects indicated perceived direction of motion after each  
130 presentation and their contrast thresholds (per condition) were calculated using adaptive  
131 Bayesian staircases. Each staircase consisted of 50 trials and thresholds were averaged across  
132 three staircase repeats per condition for each subject.

### 133 **Mantis Experiments M1, M2**

134 **Insects.** The insects used in experiments were 6 individuals of the species *Sphodromantis*  
135 *lineola*. Each insect was stored in a plastic box of dimensions 17×17×19 cm with a porous lid  
136 for ventilation and fed a live cricket twice per week. The boxes were kept at a temperature of  
137 25° C and were cleaned and misted with water twice per week.

138 **Visual Stimulus – Experiment M1.** In Experiment M1, signal spatial frequencies ( $f_s$ ) were  
139 either 0.04 cpd or 0.2 cpd and noise was either (1) not present, (2) added with  $f_n = 0.04$  cpd  
140 or (3) added with  $f_n = 0.2$  cpd. Noise again had a spatial bandwidth of 1 octave. For each of  
141 the 6 combinations of grating frequency and noise setting, trials were run with grating  
142 Michelson contrast levels of  $[2^{-6}, 2^{-5} \dots 2^{-1}]$  to calculate contrast detection thresholds.  
143 There were thus 36 different conditions in total. A total of 6 mantises each ran 10 repeats of  
144 each condition (360 trials).

145 **Visual Stimulus – Experiment M2.** Ideally, we wished our grating to contain a single spatial  
146 frequency when presented on the mantis retina. A grating rendered on a flat screen whose  
147 spatial periods are constant in pixels is non-uniform in visual degrees (Anderson and Burr  
148 1987): a given number of pixels at the edge of the screen projects to a smaller angle than the  
149 same number directly in front of the viewer. This distortion is generally neglected in human  
150 psychophysics but is potentially important at the small viewing distance (7 cm) used in our  
151 experiments. To correct for this, we applied a non-linear horizontal transformation in

152 Experiment M2 so that grating periods subtend the same visual angle irrespective of their  
153 position on the screen, using the technique described in Nityananda et al. 2017. This was  
154 achieved by calculating the visual degree corresponding to each screen pixel using the  
155 function:

$$\alpha(p) = \text{atan}\left(\frac{p}{RD}\right) \quad (1)$$

156 where  $p$  is the horizontal pixel position relative to the centre of the screen,  $\alpha(p)$  is its visual  
157 angle,  $R$  is the horizontal screen resolution in pixels/cm and  $D$  is the viewing distance. To an  
158 observer standing more than  $D$  cm away from the screen, a grating rendered with this  
159 transformation looked more compressed at the centre of the screen compared to the  
160 periphery. At  $D$  cm away from the screen, however, grating periods in all viewing directions  
161 subtended the same visual angle and the stimulus thus appeared uniform (in degrees) as if  
162 rendered on a cylindrical drum. This correction only works perfectly if the mantis head is in  
163 exactly the intended position at the start of each trial, and is most critical at the edges of the  
164 screen. As an additional precaution against spatial distortion or any stimulus artefacts caused  
165 by oblique viewing we restricted all gratings to the central  $85^\circ$  of the visual field by  
166 multiplying the stimulus luminance levels  $L(x, y, t)$  with the following Butterworth window:

$$w(p) = \frac{1}{1 + \left(\frac{\sqrt{p^2}}{S_w/2}\right)^{2n}} \quad (2)$$

167 where  $x$  is the horizontal pixel position relative the middle of the screen,  $S_w$  is the window  
168 size (distance between the 0.5 gain points) in pixels, chosen as 512 pixels in our experiment  
169 (subtending a visual angle of  $85^\circ$  at the viewing distance of the mantis) and  $n$  is the window  
170 order (chosen as 10). This restriction minimised any spread in spatial frequency at the mantis  
171 retina due to imperfections in our correction formula described by Equation (1).

172 With the above manipulations the presented stimulus (as a function of pixel horizontal  
173 position  $p$  and frame number  $j$ ) was:

$$I(p, j) = \frac{1}{2} + \frac{1}{2}w(p) \left[ c_s \cos(2\pi(f_s \alpha(p) + d f_t t)) + c_n \cos(2\pi(f_n \alpha(p) + \phi_j)) \right] \quad (3)$$

174 where  $I$  is pixel luminance, in normalised units where 0 is the minimum and 1 the maximum  
175 luminance available on the screen (0.161 and 103 cd/m<sup>2</sup> respectively),  $c_s$  is signal contrast  
176 (varied across trials),  $c_n$  is noise contrast (fixed at 0.2),  $f_s$  and  $f_n$  are the spatial frequency of  
177 signal and noise respectively (both varied across trials),  $f_t$  is signal temporal frequency (fixed  
178 at 8 Hz),  $d$  indicates motion direction (either 1 or -1 on each trial),  $\phi_j$  is picked randomly  
179 from a uniform distribution between 0 and 1 on every frame of the trial,  $t$  is time in seconds  
180 (given by  $t = j/85$ ), and  $\alpha(p)$  is the pixel visual angle according to Equation (1).

181 Still frames, space-time plots and spatiotemporal Fourier amplitude spectra of the masked  
182 condition stimuli used in Experiment M2 are shown in Fig .

183 **Experimental Setup.** The setup consisted of a CRT monitor (HP P1130) and a 5×5 cm  
184 Perspex base onto which mantises were placed hanging upside down facing the [horizontal  
185 and vertical] middle point of the screen at a distance of 7 cm. The Perspex base was held in  
186 place by a clamp attached to a retort stand and a web camera (Kinobo USB B3 HD Webcam)  
187 was placed underneath providing a view of the mantis but not the screen. The monitor,  
188 Perspex base and camera were all placed inside a wooden enclosure to isolate the mantis  
189 from distractions and maintain consistent dark ambient lighting during experiments.

190 The screen had physical dimensions of 40.4×30.2 cm and pixel dimensions of 1600×1200  
191 pixels. At the viewing distance of the mantis the horizontal extent of the monitor subtended a  
192 visual angle of 142°. The mean luminance of the monitor was 13.2 cd/m<sup>2</sup> and its refresh rate  
193 was 85 Hz.

194 The monitor was connected to a Dell OptiPlex 9010 (Dell, US) computer with an Nvidia  
195 Quadro K600 graphics card and running Microsoft Windows 7. All experiments were  
196 administered by a Matlab 2012b (Mathworks, Inc., Massachusetts, US) script which was  
197 initiated at the beginning of each experiment and subsequently controlled the presentation of  
198 stimuli and the storage of keyed-in observer responses. The web camera was connected and  
199 viewed by the observer on another computer to reduce the processing load on the rendering  
200 computer's graphics card and minimize the chance of frame drops. Stimuli were rendered  
201 using Psychophysics Toolbox Version 3 (PTB-3) (Brainard 1997; Pelli and Brainard 1997;  
202 Kleiner et al. 2007).

203 **Experimental Procedure.** Each experiment consisted of a number of trials in which an  
204 individual mantis was presented with moving gratings of varying parameters. An  
205 experimenter observed the mantis through the camera underneath and blindly coded the  
206 direction of the elicited optomotor response (if any). The response code for each trial was  
207 either “moved left”, “moved right” or “did not move”. There were equal repeats of left-  
208 moving and right-moving gratings of each condition in all experiments. Trials were randomly  
209 interleaved by the computer.

210 In between trials a special “alignment stimulus” was presented and used to steer the mantis  
211 back to its initial body and head posture as closely as possible. The alignment stimulus  
212 consisted of a chequer-like pattern which could be moved in either horizontal direction by  
213 keyboard shortcuts and served to re-align the mantis by triggering the optomotor response.

214 **Calculating Contrast Detection Thresholds.** After conducting Experiments M1 and M2 we  
215 calculated motion probability  $P$  (for each individual and stimulus condition) as the proportion  
216 of trials in which the mantis moved in the same direction as the signal grating. As in  
217 (Nityananda et al. 2015), the number of trials on which the mantis was coded as moving in

218 the opposite direction was negligible. We then fitted the individuals' responses using the  
219 psychometric function:

$$P(c; T, \sigma) = \frac{1}{2} \left( 1 + \operatorname{erf} \left( \frac{\log c/T}{\sqrt{2}\sigma} \right) \right) \quad (4)$$

220 where  $c$  is the contrast of the signal grating,  $T$  is the contrast detection threshold (the contrast  
221 corresponding to  $P = 0.5$ ) and  $\sigma$  represents the function's steepness. The parameters  $c_{th}$  and  
222  $\sigma$  were calculated using maximum likelihood estimation in Matlab assuming the mantises'  
223 responses had a simple binomial distribution. Therefore:

$$(T, \sigma) = \operatorname{argmin} \left( \sum_{i=1}^N m_i \log P(c_i; T, \sigma) + (n_i - m_i) \log(1 - P(c_i; T, \sigma)) \right) \quad (5)$$

224 where the subscript  $i$  indicates different contrast levels,  $n_i$  is the total number of trials done  
225 for contrast  $c_i$ ,  $m_i$  is the number of trials in which the mantis moved in the grating direction,  
226  $P$  is motion probability given by Equation (4) and  $N$  is the number of contrast levels.  
227 Detection thresholds were fitted to each insect's individual data, and detection thresholds  
228 were then averaged across the population.

229 **Data Collection.** In Experiment M1, six animals ran two blocks of trials each. Each block  
230 had 360 randomly-interleaved trials consisting of 60 repeats of each grating condition and  
231 mantis responses were coded by WH.

232 In Experiment M2, six animals ran a single block of trials each. Each block had 360  
233 randomly-interleaved trials consisting of 60 repeats of each grating condition and mantis  
234 responses were coded by SE.

## 235 **Results**

### 236 **Experiment H1**

237 We measured the contrast detection thresholds of 4 human observers for direction  
238 discrimination in moving gratings under different masking conditions. The signal was  
239 a vertical sinusoidal grating (of temporal frequency 8 Hz, spatial frequency  $f_s$  and variable  
240 contrast) drifting to either left or right in each presentation. We used two different signal  
241 frequencies:  $f_s = 0.4$  cpd and  $f_s = 2$  cpd. Pilot work indicated that these were on either side of  
242 peak sensitivity and that thresholds were the same for both. Noise was added in a subset of  
243 trials; it had a spatial bandwidth of 1 octave around either 0.4 or 2 cpd and was temporally  
244 broadband.

245 We will henceforth refer to the various conditions of our masking experiments using the  
246 notation S+N where S indicates signal frequency and is either H for the high frequency (2  
247 cpd) or L for the low frequency (0.04 cpd) and N similarly indicates noise frequency. The  
248 condition H+L therefore refers to the grating with  $f_s = 2$  cpd and  $f_n = 0.4$  cpd. Grating  
249 conditions with no noise are simply referred to as H and L. Still frames, space-time plots and  
250 the spatiotemporal Fourier amplitude spectra of the masked conditions (L+L, L+H, H+L,  
251 H+H) are shown in Fig .

252 Human contrast thresholds are shown in Fig 2. The thresholds for signal alone (H and L) do  
253 not differ significantly. Adding noise at either frequency caused a significant increase in  
254 threshold for both signal frequencies: there were significant differences in thresholds for L+L  
255 and L (paired  $t(3) = 13.0$ ,  $p < 0.001$ ), for L+H and L (paired  $t(3) = 13.8$ ,  $p < 0.001$ ), for H+L  
256 and H (paired  $t(3) = 14.7$ ,  $p < 0.001$ ) and for H+H and H (paired  $t(3) = 26.0$ ,  $p < 0.001$ ).  
257 However, for both the 0.4 and 2 cpd signal frequencies, the threshold was higher when noise  
258 and signal frequencies were the same compared to when they were different: there were  
259 significant differences in thresholds for L+L and L+H (paired  $t(3) = 4.5$ ,  $p = 0.021$ ) and for

260 H+H and H+L (paired  $t(3) = 8.4$ ,  $p = 0.003$ ). These results are consistent with previous  
261 studies in human literature which have shown that maximal masking occurs when noise is of  
262 equal or near frequency to that of the signal (Anderson and Burr 1985, 1989).

### 263 **Experiment M1**

264 We also ran essentially the same experiment in insects. Mantises were placed in front of a  
265 computer screen and viewed full screen gratings drifting horizontally to either left or right in  
266 each trial. The stimuli were the same as described for humans above, except that the spatial  
267 frequencies were lowered in order to account for the poorer spatial acuity of insect vision.  
268 The high (H) and low (L) spatial frequencies were set to 0.2 and 0.04 cpd respectively (the  
269 mantis optomotor response is approximately equally sensitive at those frequencies  
270 (Nityananda et al, 2015)). An experimenter observed the mantis through a camera and coded  
271 the direction of the elicited optomotor response (if any) blind to the stimulus. Detection rates  
272 were later calculated per condition and individual as the proportion of trials in which the  
273 mantis moved in the same direction as the grating.

274 We measured the contrast detection thresholds for each of the conditions L+L, L+H, H+L,  
275 H+H as well as the non-masked grating conditions H and L. Fig 3 shows the response rates  
276 and fitted psychometric functions of one individual for illustration. Clearly, adding noise  
277 tends to move the psychometric function to the right. That is, in the presence of noise, the  
278 signal grating has to have higher contrast before it will reliably elicit an optomotor response  
279 from the insect. To quantify this we compared the contrast detection thresholds, averaged  
280 across 6 mantises, for the 6 different conditions (Fig 4). In the absence of noise, thresholds  
281 do not differ significantly between the low and high spatial frequency of the signal gratings  
282 (paired  $t(5) = 0.7$ ,  $p = 0.494$  comparing H and L) as expected since these two frequencies  
283 were chosen to drive the optomotor response equally. Adding low-frequency noise  
284 significantly increases thresholds for both signal frequencies: there were significant threshold

285 differences for L+L and L (paired  $t(5) = 7.9$ ,  $p < 0.001$ ) and for H+L and H (paired  $t(5) = 4.8$ ,  
286  $p = 0.005$ ). We again see no difference in thresholds depending on the signal frequency  
287 (paired  $t(5) = 2.0$ ,  $p = 0.096$  comparing H+L and L+L). However, when we add high-  
288 frequency noise, we see a very large difference between the two signal frequencies. High-  
289 frequency noise again significantly increases thresholds (paired  $t(5) = 4.0$ ,  $p = 0.01$   
290 comparing L+H and L, paired  $t(5) = 7.6$ ,  $p < 0.001$  comparing H+H and H). The high-  
291 frequency signal is affected as badly by high-frequency noise as by low-frequency noise  
292 (paired  $t(5) = 0.1$ ,  $p = 0.894$  comparing H+H and H+L). However, the low-frequency signal  
293 is far less affected by high-frequency noise (paired  $t(5) = -4.2$ ,  $p = 0.009$  comparing  
294 thresholds for L+H and L+L). Note that this is not because high-frequency noise has an  
295 intrinsically small effect. The high-frequency noise has a very substantial effect on the high-  
296 frequency signal, just not on the low-frequency signal.

297 Experiments H1 and M1 demonstrate the presence of interactions between signal and noise  
298 frequencies in both humans and mantises. The responses of the two species, however, were  
299 qualitatively different. In humans, noise had a greater effect when presented at the signal  
300 frequency and a lesser effect at the other frequency. Mantises on the other hand were affected  
301 to the same degree by either noise frequency at the 0.2 cpd signal frequency, and more  
302 strongly by the noise frequency 0.04 cpd when signal frequency was also 0.04 cpd. In other  
303 words, mantises were affected most when noise frequency was equal or lower than signal  
304 frequency (across the frequencies 0.04 and 0.2 cpd). This indicates a qualitative difference  
305 between the two species.

## 306 **Experiment M2**

307 The stimuli and experimental procedures were as similar as possible for both humans and  
308 mantises, with spatial frequencies chosen appropriate to each species' contrast sensitivity  
309 function. However, one difference was that mantises were observing the screen from a much



310 shorter viewing distance (7 cm as opposed to 100 cm for human subjects). When viewing a  
311 flat screen from a short distance the stimulus appears spatially distorted; uniform gratings  
312 subtend smaller visual angles at the periphery and may therefore consist of several spatial  
313 frequencies (in cpd). Thus, for mantises, the signal gratings effectively varied in spatial  
314 frequency across the stimulus, whereas for humans they were much more nearly constant. To  
315 test whether this distortion could have influenced our findings from Experiment M1, we  
316 repeated the same experiment using a modified stimulus. Previous studies have shown that  
317 the optomotor response of the mantis is driven predominantly by the central visual field  
318 (Nityananda et al 2017). The new stimulus was therefore different in three ways: (1) it was  
319 limited to the central 85 degrees of the visual field, (2) it was corrected for spatial distortion  
320 by introducing a non-linear horizontal transformation and (3) noise was restricted to a single  
321 spatial frequency.

322 Fig 5 shows the mean of the contrast detection thresholds, averaged across the 6 insects, for  
323 the six different conditions. Sensitivity was now much lower, particularly for the high  
324 frequency, presumably reflecting the alterations to the stimulus. Despite these differences, we  
325 found the same qualitative trend observed in Experiment M1. Masking was strongest when  
326 noise frequency was equal to or lower than signal frequency (across 0.04 and 0.2 cpd). The  
327 addition of noise caused a significant increase in thresholds across all conditions: L+L and L  
328 (paired  $t(5) = 12.5$ ,  $p < 0.001$ ), L+H and L (paired  $t(5) = 8.7$ ,  $p < 0.001$ ), H+L and H (paired  
329  $t(5) = 3.8$ ,  $p = 0.013$ ) and H+H and H (paired  $t(5) = 2.7$ ,  $p = 0.043$ ). For the 0.04 cpd signal  
330 frequency grating, noise at the same frequency caused a significantly larger increase  
331 compared to noise at the higher frequency (paired  $t(5) = 6.4$ ,  $p < 0.001$  comparing L+L and  
332 L+H). There was no significant difference, however, between adding noise at either  
333 frequency in case of the 0.2 cpd signal frequency (paired  $t(5) = 1.1$ ,  $p = 0.324$  comparing  
334 H+L and H+H). That is, noise is equally effective whether added at the signal frequency or at

335 a lower frequency, but less effective when added at a higher frequency. The agreement  
336 between our findings in Experiments M1 and M2 suggest that the difference in stimulus  
337 viewing distances, and the resultant distortion, does not explain the qualitative differences in  
338 mantis and human responses.

339 **Discussion**

340 In a previous paper, we documented a striking difference between insect and human motion  
341 perception (Tarawneh et al. 2017). This difference relates to the robustness of perception  
342 under visual noise. In both species, some spatial frequencies are more effective “masks” than  
343 others. In human vision, the effectiveness of a given spatial frequency as a mask depends on  
344 two things: (i) how visible that spatial frequency is to the organism, and (ii) how close that  
345 spatial frequency is to the signal. Noise at frequencies that are less visible, or that are further  
346 from the signal frequency, is less effective at masking the signal. In insects, this apparently  
347 obvious result does not hold. We found previously that while noise higher than the signal  
348 frequency does indeed lose effectiveness as a mask, noise lower than the signal masks  
349 essentially independently of the distance between noise and signal – even when the noise is  
350 presented at such low frequencies that a signal there would elicit no response.

351 Because this finding is so counter-intuitive, it was important to validate it with a different  
352 paradigm, in which we directly compare humans and insects. That is what we have done in  
353 the present paper. Here, we selected two spatial frequencies, one high and one low, on either  
354 side of the organism’s peak sensitivity. These were chosen to be equally visible, or more  
355 precisely, to have equal contrast thresholds on a motion direction discrimination task. We  
356 then examined the effect of adding noise either at the same frequency, or the other frequency.  
357 We measured thresholds using the psychometric function obtained with the Method of  
358 Constant Stimuli, with the contrast of the signal grating as the varying parameter (Fig 3).

359 In humans, noise had a significantly stronger masking effect when at the same frequency as  
360 the signal; noise at a higher or lower frequency had less effect (Fig 2). In mantises, noise was  
361 equally effective whether added at the signal frequency or at a lower frequency, but less  
362 effective when added at a higher frequency (Fig 5). This agrees with our previous experiment

363 using response rates at a fixed contrast. The effect is predicted by the current model of insect  
364 motion perception, combined with the low-pass nature of insect spatial filtering (Tarawneh et  
365 al. 2017). The experiments presented here confirm that the phenomenon affects contrast  
366 threshold, not just the response rate at one selected contrast, and strengthen our previous  
367 conclusions.

368

369 **Acknowledgements**

370 Thanks to David Peterzell, Candy Rowe and Claire Rind for helpful discussions. Thanks to  
371 Adam Simmons for excellent insect care and husbandry.

372 **Competing Interests**

373 The authors declare they have no competing interests

374 **Funding**

375 VN, GT and RR were supported by Leverhulme Trust Research Leadership Award RL-2012-  
376 019 to JR. ISP was supported by grant PSI2014-51960-P from Ministerio de Economía y  
377 Competitividad (Spain).

378 **Data Availability**

379 Data will be made publicly available on at [www.jennyreadresearch.com](http://www.jennyreadresearch.com).

380 **Author Contributions**

381 GT/ISP/VN: designed the experiments

382 GT/ISP: programmed visual stimuli and experiment scripts

383 GT: analysed the results and wrote the paper

384 SAP: carried out the human experiment (H1)

385 SE/WH: carried out mantis experiments (M1, M2)

386 VN/RR: contributed to discussions and helped write paper

387 NB/JT: conducted pilot experiments

388 JR/ISP: supervised the project and helped write paper

389 **References**

- 390 Anderson SJ, Burr DC (1985) Spatial and temporal selectivity of the human motion detection  
391 system. *Vis Res* 25:1147–1154. doi: 0042-6989(85)90104-X [pii]
- 392 Anderson SJ, Burr DC (1987) Receptive field size of human motion detection units. *Vis Res*  
393 27:621–635. doi: 0042-6989(87)90047-2 [pii]
- 394 Anderson SJ, Burr DC (1989) Receptive field properties of human motion detector units  
395 inferred from spatial frequency masking. *Vis Res* 29:1343–1358.
- 396 Bahl A, Ammer G, Schilling T, Borst A (2013) Object tracking in motion-blind flies. *Nat*  
397 *Publ Gr* 16:730–738. doi: 10.1038/nn.3386
- 398 Borst A (2014) Fly visual course control: behaviour, algorithms and circuits. *Nat Rev*  
399 *Neurosci* 15:590–9. doi: 10.1038/nrn3799
- 400 Borst A, Bahde S (1988) Visual information processing in the fly’s landing system. *J Comp*  
401 *Physiol A* 163:167–173. doi: 10.1007/BF00612426
- 402 Brainard DH (1997) The Psychophysics Toolbox. *Spat Vis* 10:433–436.
- 403 Hassenstein B, Reichardt W (1956) Systemtheoretische analyse der zeit-, reihenfolgen-und  
404 vorzeichenbewertung bei der bewegungsperzeption des rüsselkäfers chlorophanus.  
405 *Zeitschrift für Naturforsch B* 11:513–524.
- 406 Kleiner M, Brainard D, Pelli D, et al (2007) What’s new in Psychtoolbox-3. *Perception* 36:1.
- 407 Lu Z-L, Doshier B (2014) *Visual psychophysics: From laboratory to theory*. MIT Press,  
408 Cambridge, Massachusetts
- 409 Moore, BCJ (2012) *An Introduction to the psychology of hearing*. Emerald group publishing  
410 limited. Bingley, UK.

- 411 Nityananda V, Tarawneh G, Jones L, et al (2015) The contrast sensitivity function of the  
412 praying mantis *Sphodromantis lineola*. *J Comp Physiol A Neuroethol Sens Neural*  
413 *Behav Physiol* 201:741–50. doi: 10.1007/s00359-015-1008-5
- 414 Nityananda V, Tarawneh G, Errington S, Serrano-Pedraza I, Read J (2017) - The optomotor  
415 response of the praying mantis is driven predominantly by the central visual field. *J*  
416 *Comp Physiol A* 203:77-87.
- 417 Pelli DG, Brainard DH (1997) The VideoToolbox software for visual psychophysics:  
418 Transforming numbers into movies. *Spat Vis* 10:433–436.
- 419 Reichardt W, Wenking H (1969) Optical detection and fixation of objects by fixed flying  
420 flies. *Naturwissenschaften* 56:424–5.
- 421 Riehle A, Franceschini N (1984) Motion detection in flies: parametric control over ON-OFF  
422 pathways. *Exp brain Res* 54:390–394.
- 423 Srinivasan M V, Lehrer M, Kirchner WH, Zhang SW (1991) Range perception through  
424 apparent image speed in freely flying honeybees. *Vis Neurosci* 6:519–535.
- 425 Tarawneh G, Nityananda V, Rosner R, et al (2017) When invisible noise obscures the signal:  
426 the consequences of nonlinearity in motion detection. *Scientific Reports*, in press
- 427 (preprint available at <http://biorxiv.org/content/early/2017/01/05/098459>)



428 **Figures**

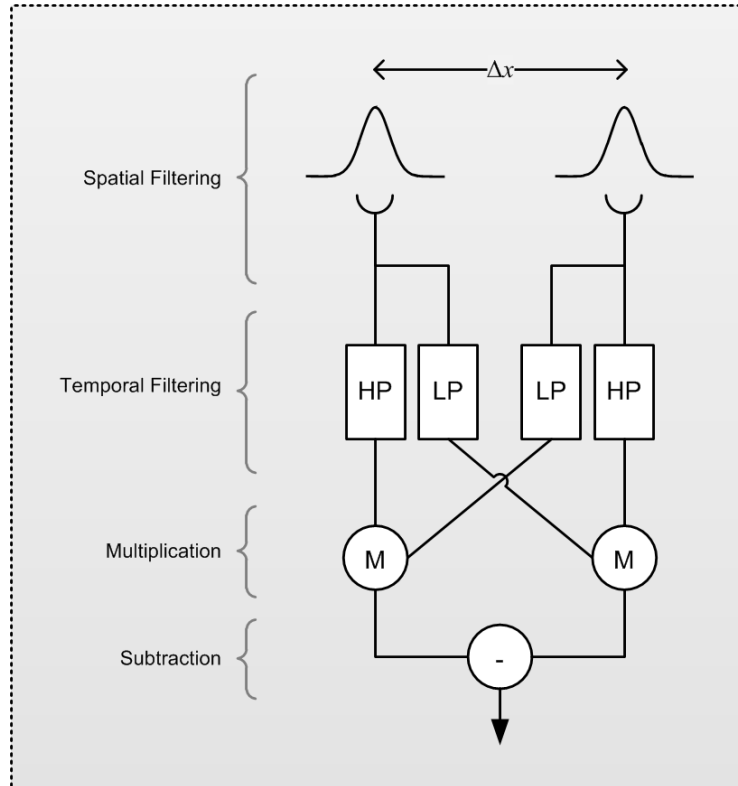

429

430 **Fig 1: The Elementary Motion Detector (EMD).**

431 The spatial input from two identical Gaussian filters separated by  $\Delta x$  is passed through high and low pass  
432 temporal filters (HP and LP respectively). The LP output in each subunit is cross-correlated with the HP output  
433 from the other subunit using a multiplication stage (M) and the two products are then subtracted to produce a  
434 direction-sensitive measure of motion.

435

436

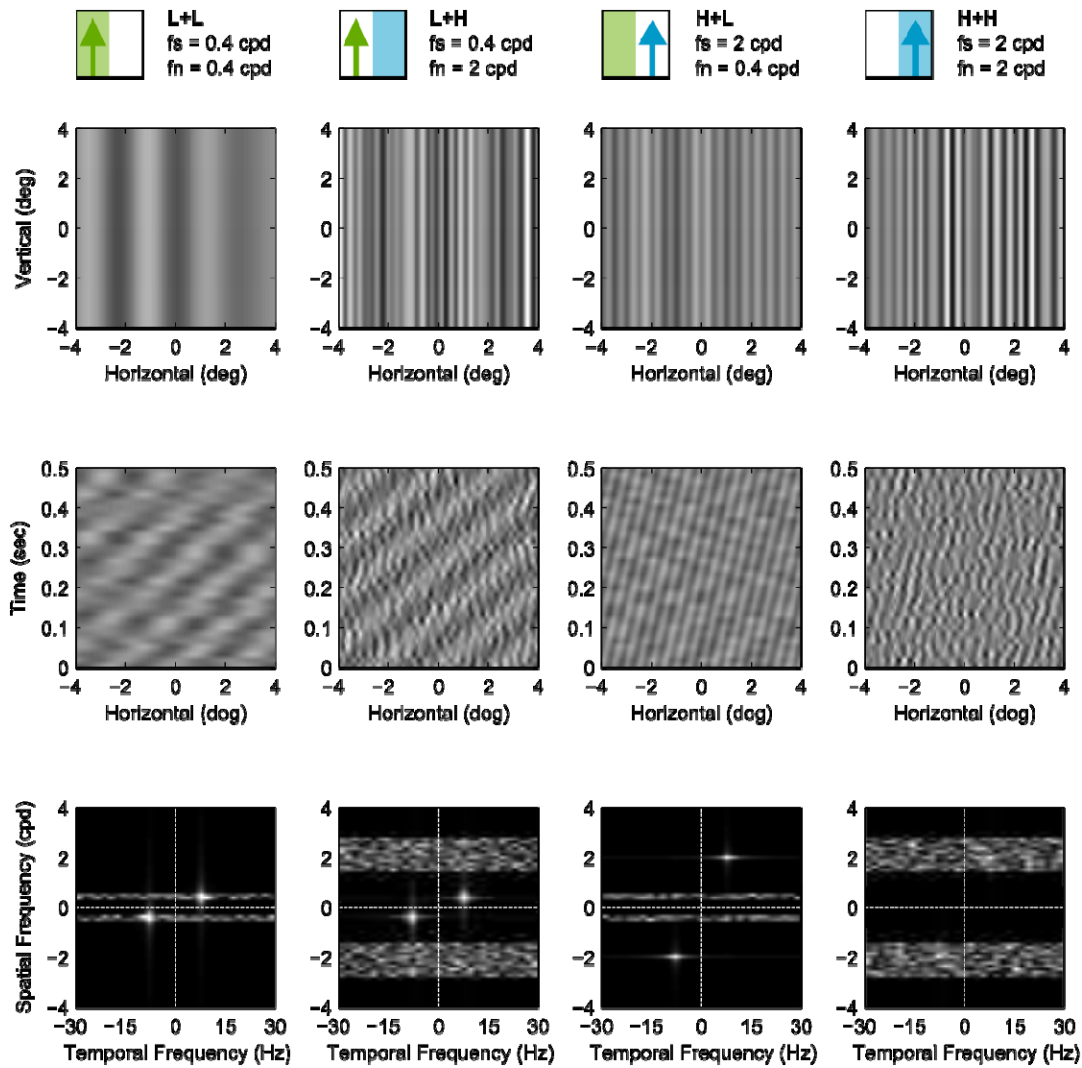

437

438 **Fig 2: Masked grating stimulus conditions used in Experiment H1**

439 Each column of panels represents one stimulus condition. The cartoons at the top represent the conditions  
440 graphically and are used in subsequent figures for easy reference (signal is the upwards pointing arrow and noise  
441 is the coloured rectangle). Top row of panels shows still frames of each condition while middle and bottom  
442 panel rows show corresponding space-time plots and Fourier spatio-temporal amplitude spectra respectively. In  
443 these plots the signal contrast was set to 0.2.

444

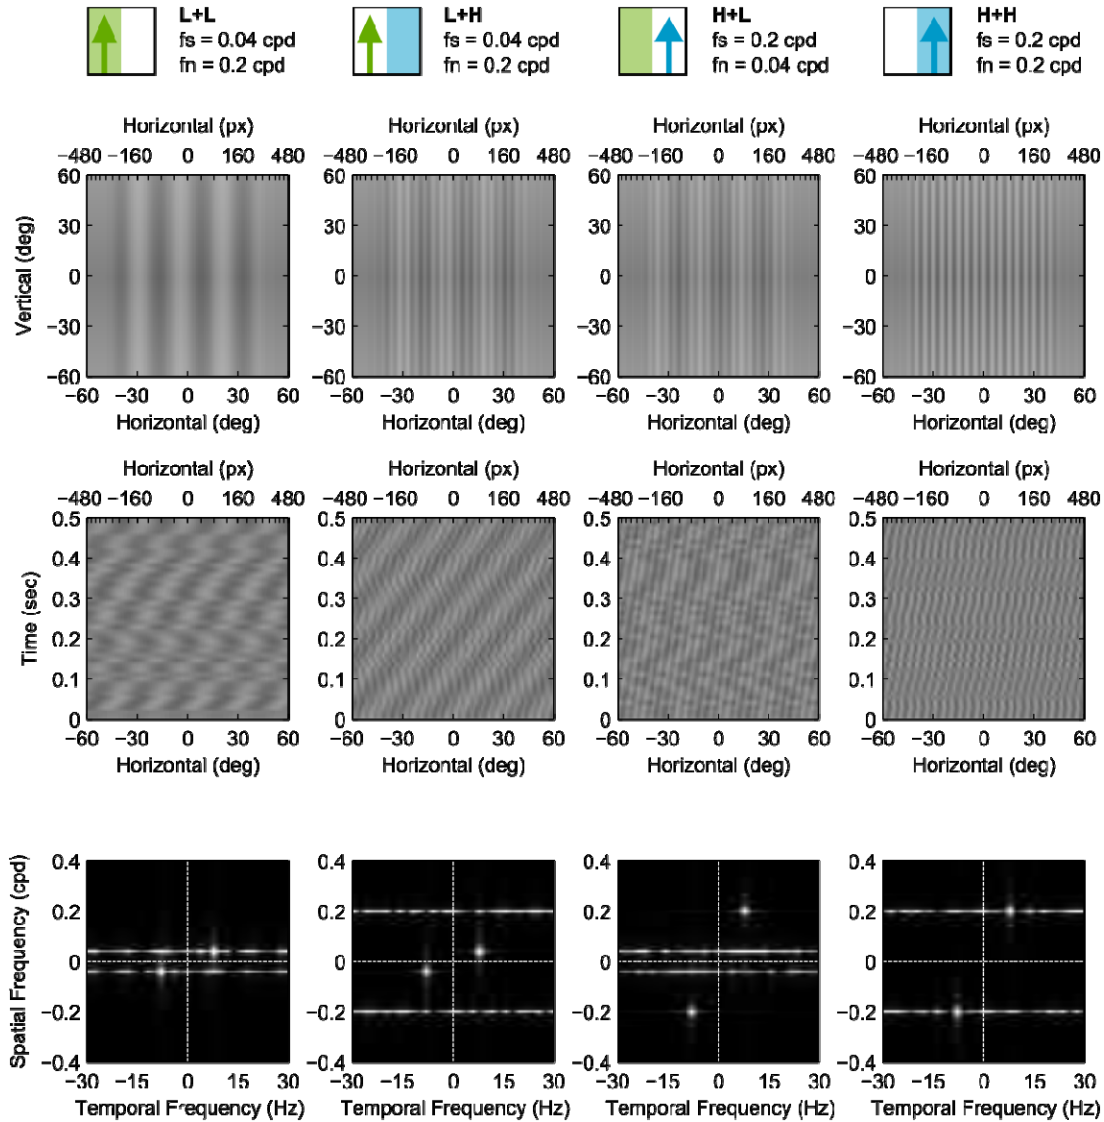

445

446 **Fig 3: Masked grating stimulus conditions used in Experiment M2**

447 Each column of panels represents one stimulus condition. Top row of panels shows still frames of each  
 448 condition while middle and bottom panel rows show corresponding space-time plots and Fourier spatio-  
 449 temporal amplitude spectra respectively. In these plots the signal contrast was set to 0.1. These stimuli  
 450 conditions are similar to their correspondents in Experiment H1 (Fig ) but were modified in three ways: (1) they  
 451 were limited to the central 85 degrees of the visual field, (2) they were corrected for spatial distortion by  
 452 introducing a non-linear horizontal transformation and (3) their noise was restricted to a single spatial  
 453 frequency.

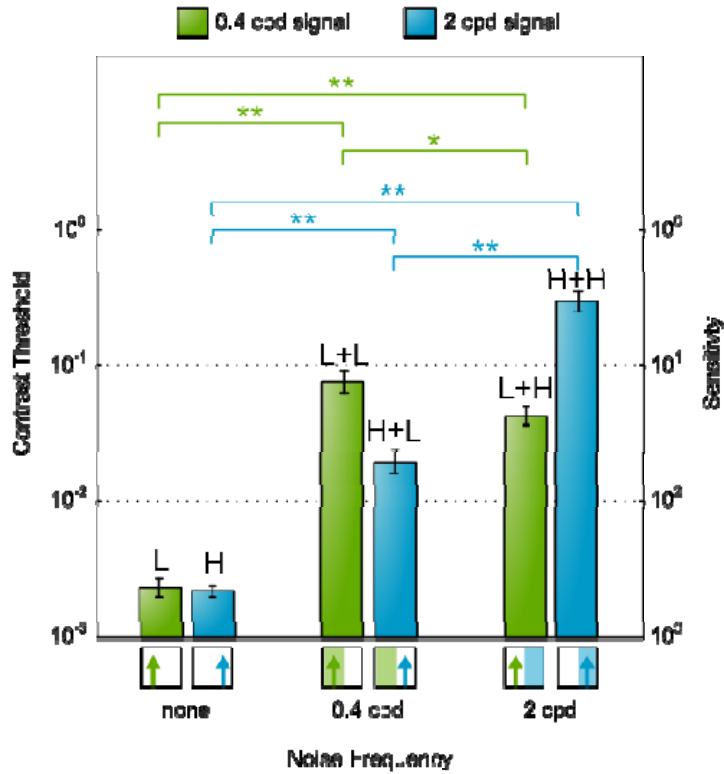

454

455 **Fig 2: Human motion detection contrast thresholds for different combinations of signal and noise**  
 456 **frequencies (measured in Experiment H1).**

457 Bars show mean contrast detection thresholds for 4 subjects and error bars show ± standard error of the mean.  
 458 Horizontal brackets indicate threshold pairs that differ significantly (paired t-test, \*  $p \leq 0.05$  and \*\*  $p \leq$   
 459  $0.01$ ). Results show that each of the two signals frequencies 0.4 (blue) and 2 cpd (green) was masked  
 460 significantly higher by same-frequency noise compared to different-frequency noise. Letters above bars indicate  
 461 signal and noise conditions in the format Signal + Noise (S + N). L indicate low spatial frequency, H indicates  
 462 high spatial frequency. So for example L + H indicates low frequency signal and high frequency noise.

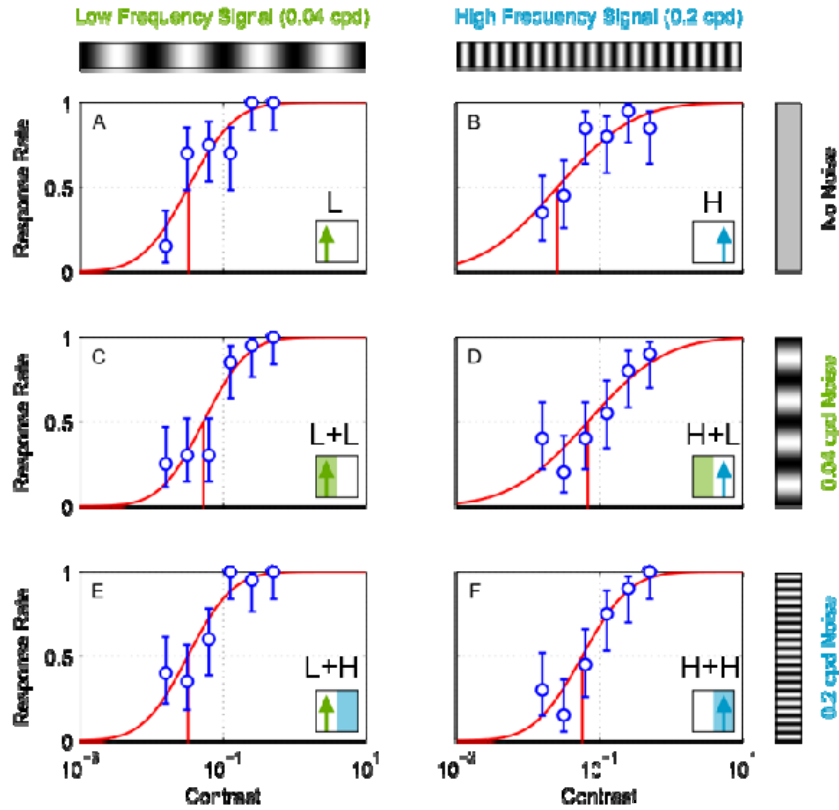

463

464 **Fig 3: Responses, fitted psychometric curves and detection thresholds of a single mantis (measured in**  
 465 **Experiment M1).**

466 Circles show response rates (i.e. proportion of trials on which the mantis was coded as moving in the same  
 467 direction as the signal grating) as a function of signal grating contrast. Error-bars are 95% confidence intervals  
 468 calculated from simple binomial statistics. Red curves show fitted psychometric function (Equation (4)); red  
 469 vertical lines mark contrast threshold. (ACE): low-frequency signal (i.e. 0.04 cpd); (BDF): high-frequency  
 470 signal (i.e. 0.2 cpd). Insets at the bottom right corner of each panel indicate signal and noise frequencies as in  
 471 Fig 2. (AB): No noise: stimulus is a pure drifting luminance grating. (CD): Low-frequency noise, i.e.  
 472 superimposed on the drifting signal grating is a grating of 0.04 cpd whose phase is updated randomly on every  
 473 frame. (EF): High-frequency noise. The data plotted in this figure are all from a single individual (mantis F11)  
 474 and were measured in Experiment M1. Letters to the right of the curves indicate signal and noise conditions in  
 475 the format Signal + Noise (S + N). L indicate low spatial frequency, H indicates high spatial frequency. So for  
 476 example L + H indicates low frequency signal and high frequency noise.

477

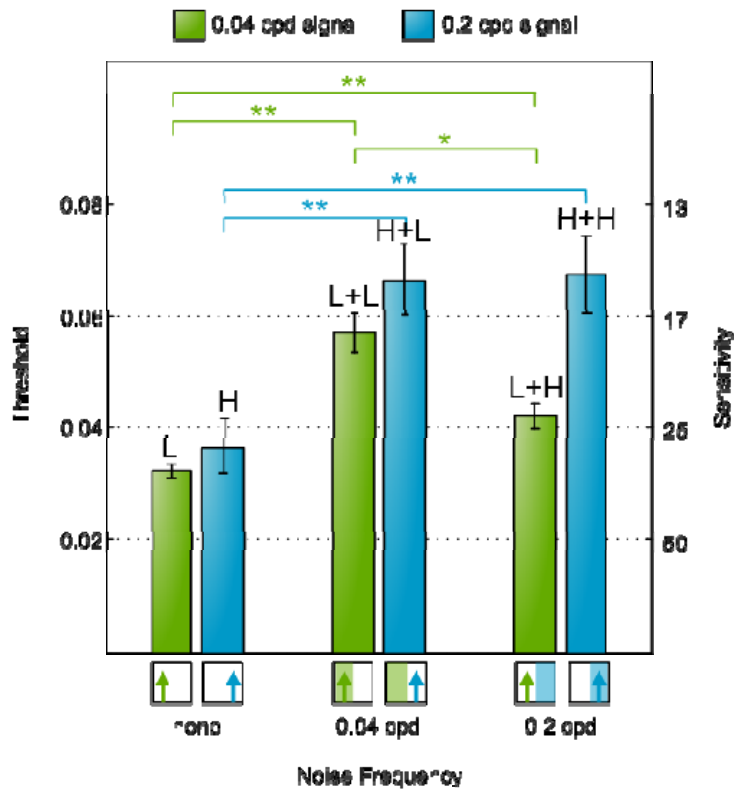

478

479

480 **Fig 4: Mantis motion detection contrast thresholds for different combinations of signal and noise**  
 481 **frequencies (measured in Experiment M1).**

482 Bars show mean contrast detection thresholds for 6 insects and error bars show  $\pm$  standard error of the mean.  
 483 Horizontal brackets indicate threshold pairs that differ significantly (paired t-test, \*  $p \leq 0.05$  and \*\*  $p \leq$   
 484  $0.01$ ). Diagrams below bars indicate stimuli conditions as in Fig 2. Results show that the 0.2 cpd signal was  
 485 masked to similar degrees by noise at either frequency while the 0.04 cpd signal was masked more strongly by  
 486 the 0.04 cpd noise. Letters above bars indicate signal and noise conditions in the format Signal + Noise (S + N).  
 487 L indicate low spatial frequency, H indicates high spatial frequency. So for example L + H indicates low  
 488 frequency signal and high frequency noise.

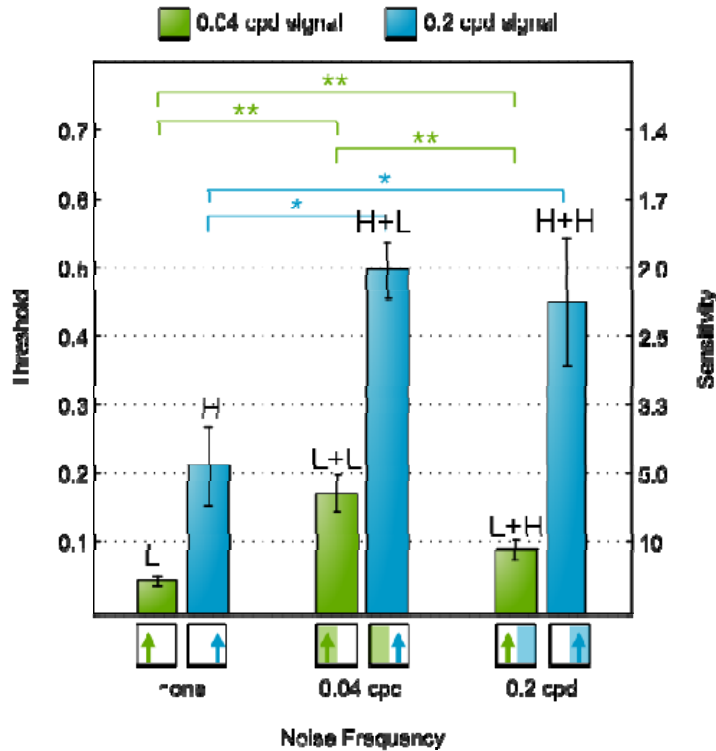

489

490 **Fig 5: Mantis motion detection contrast thresholds for different combinations of signal and noise**  
 491 **frequencies (measured in Experiment M2).**

492 Bars show mean contrast detection thresholds for 6 insects and error bars show  $\pm$  standard error of the mean.  
 493 Horizontal brackets indicate threshold pairs that differ significantly (paired-sample t-test, \*  $p \leq 0.05$  and \*\*  
 494  $p \leq 0.01$ ). Diagrams below bars indicate stimuli conditions as in Fig 2. The results show the same qualitative  
 495 differences observed in Experiment M1 (Fig 4): the 0.2 cpd signal is masked to similar degrees by noise at  
 496 either frequency while the 0.04 cpd signal is masked more strongly by 0.04 cpd noise. This similarity excludes  
 497 the possibility that mantis and human results were different because stimuli appeared spatially distorted to  
 498 mantises. Letters above bars indicate signal and noise conditions in the format Signal + Noise (S + N). L  
 499 indicate low spatial frequency, H indicates high spatial frequency. So for example L + H indicates low  
 500 frequency signal and high frequency noise.
